## Chronic heart failure in younger patients: temporal trends in clinical characteristics, treatment and outcomes over two decades in a nationwide cardiology registry

M. Iacoviello<sup>1</sup>, M. Marini<sup>2</sup>, M. Gori<sup>3</sup>, L. Gonzini<sup>4</sup>, M. Benvenuto<sup>5</sup>, L. Cassaniti<sup>6</sup>, A. Municino<sup>7</sup>, A. Navazio<sup>8</sup>, E. Ammirati<sup>9</sup>, M. Catalano<sup>10</sup>, M. Floresta<sup>11</sup>, G. Scopelliti<sup>12</sup>, D. Nassiacos<sup>13</sup>, M. Gorini<sup>4</sup>, R. De Maria<sup>14</sup>

<sup>1</sup>University of Foggia, Foggia, Italy; <sup>2</sup>University Hospital Riuniti of Ancona, Ancona, Italy; <sup>3</sup>Ospedale Papa Giovanni XXIII, Cardiology Unit, Bergamo, Italy; <sup>4</sup>Associazione Nazionale Medici Cardiologi Ospedalieri Research Center, Florence, Italy; <sup>5</sup>G. Mazzini Hospital, Cardiology Unit, Teramo, Italy; <sup>6</sup>Muscatello Hospital, Augusta, Italy; <sup>7</sup>Padre A Micone Hospital ASL3, Cardiology Unit, Genoa, Italy; <sup>8</sup>Santa Maria Nuova Hospital, Cardiology Unit, Reggio Emilia, Italy; <sup>9</sup>ASST Great Metropolitan Niguarda, Cardiology 2 - Heart Failure and Transplantation, Milan, Italy; <sup>10</sup>Cannizzaro Hospital, Cardiology Unit, Catania, Italy; <sup>11</sup>Ospedale Cervello-Villa Sofia, Cardiology Unit, Palermo, Italy; <sup>12</sup>Alta Val d'Elsa Hospital, Cardiology Unit, Poggibonsi, Italy; <sup>13</sup>Saronno General Hospital, Cardiology Unit, Saronno, Italy; <sup>14</sup>CNR Institute of Clinical Physiology, ASST Metropolitan Hospital Niguarda, Milan, Italy

On behalf of IN-HF (Italian Network on Heart Failure) Investigators

**Funding Acknowledgement:** Type of funding source: Foundation. Main funding source(s): Fondazione per il Tuo cuore – HCF onlus

**Aim of the study:** We analyzed the temporal trends in characteristics, therapy and outcomes over two decades of younger chronic heart failure (CHF) patients enrolled in our nationwide registry.

**Methods:** Among the 14823 CHF patients enrolled in the registry since January 1999 through May 2018, 5465 (37%) were aged <65 years (78% men, 54±9 years, left ventricular ejection fraction (LVEF) 36±11%). Patients were divided into 3 cohorts according with the recruitment epoch: 1999–2005; 2006–2011; 2012–2018. We analyzed trends over time of clinical characteristics, therapy, one-year all-cause mortality, all-cause mortality and/or all-cause hospitalization, all-cause mortality and/or CV hospitalization, and all-cause mortality and/or HF hospitalization.

**Results:** From 1999 to 2018 the proportion of patients <65 years declined: 42% in first (2288/5404), 37% in second (1464/3971), 31% in third period (1713/5448).

As shown in the Table, the proportion of women, diabetes, ischemic etiology and renin-angiotensin system inhibitor prescription did not change significantly among the three enrollment epochs, whereas preserved LVEF phenotype and prevalence of its driving risk factors increased. The proportion of guideline-recommended drug & device therapies significantly rose over time. All-cause mortality at 1-year follow-up decreased significantly across the 3 epochs studied (Figure).

**Conclusions:** During 20 years, the clinical characteristics, the implementation of recommended treatments and prognosis of patients <65 years enrolled in a nationwide cardiology registry have deeply changed. These modifications reflect the evolution of cardiovascular risk factors and improved management strategies of CV disease.

Table 1

| Clinical characteristics          | 1999–2005 |           |           |             | 2006–2011                                        |      |      |      | 2012–2018 |  |  |  |
|-----------------------------------|-----------|-----------|-----------|-------------|--------------------------------------------------|------|------|------|-----------|--|--|--|
|                                   | 1999–2005 | 2006–2011 | 2012–2018 | p for trend | Drug & Device therapy                            |      |      |      |           |  |  |  |
| Women %                           | 21.6      | 20.4      | 23.1      | 0.31        | Furosemide %                                     | 66.6 | 72.7 | 73.9 | <0.0001   |  |  |  |
| History of Hypertension %         | 35.5      | 43.0      | 48.3      | <0.0001     | Furosemide >75 mg/day % (available for 4275 pts) | 11.8 | 17.6 | 23.3 | <0.0001   |  |  |  |
| Diabetes %                        | 21.8      | 23.2      | 23.1      | 0.29        | Digitalis %                                      | 36.5 | 15.2 | 5.8  | <0.0001   |  |  |  |
| Obesity (BMI ≥30) %               | 23.6      | 27.5      | 29.5      | <0.0001     | Oral Anticoagulants %                            | 22.2 | 24.4 | 27.9 | <0.0001   |  |  |  |
| HF history ≥6 months %            | 46.6      | 51.9      | 66.8      | <0.0001     | Permanent pacemaker %                            | 8.0  | 4.4  | 1.5  | <0.0001   |  |  |  |
| HF admission previous 12 months % | 52.1      | 45.3      | 30.9      | <0.0001     | ACE-I/ARB/ARNI %                                 | 88.3 | 90.2 | 87.4 | 0.46      |  |  |  |
| Ischemic aetiology %              | 33.6      | 32.0      | 35.6      | 0.24        | Betablockers %                                   | 58.8 | 74.7 | 92.5 | <0.0001   |  |  |  |
| NYHA III-IV %                     | 19.5      | 17.4      | 14.7      | <0.0001     | MRA %                                            | 41.0 | 46.9 | 61.8 | <0.0001   |  |  |  |
| History of Atrial fibrillation %  | 12.5      | 17.1      | 20.2      | <0.0001     | CRT-P %                                          | 0.6  | 1.0  | 1.4  | <0.001    |  |  |  |
| LVEF <40%                         | 66.1      | 66.4      | 59.0      | <0.0001     | CRT-D %                                          | 2.2  | 6.2  | 10.5 | <0.0001   |  |  |  |
| Transplanted after 1 year         | 0.5       | 0.3       | 0.7       | 0.38        | ICD %                                            | 13.2 | 22.4 | 32.6 | <0.0001   |  |  |  |

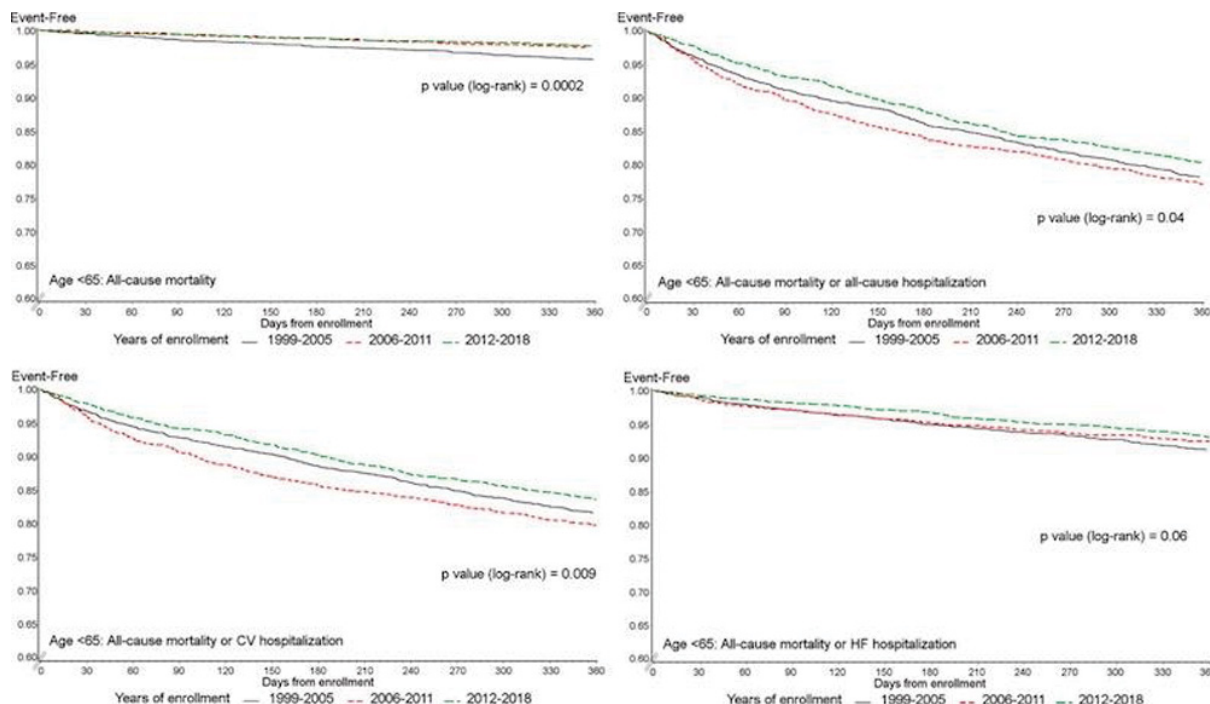

Figure 1
